# Supplementary material
Source: PubMed Central journal article supplement (PMC7868834)
Supplement: ajtr0013-0770-f5.pdf [file ajtr0013-0770-f5.pdf]

## LincRNA-01317 inhibits human gastric cancer growth

**Supplementary Table 1.** Primer sequences for real time PCR (5'-3')

| Primers for real time PCR |         |                          |
|---------------------------|---------|--------------------------|
| <i>RP11-383M4.6</i>       | forward | AGAGGCAGCAGAAGAGGAGGAAG  |
|                           | reverse | TTGGCGATGGTCTTGACTGAATCC |
| <i>LINC01098</i>          | forward | AGCAGCCGAGACAGAGCAGAG    |
|                           | reverse | GGTGGATGAACGCCAGATAGCTTC |
| <i>RP11-434D2.7</i>       | forward | AGAGGCAGCAGAAGAGGAGGAAG  |
|                           | reverse | TTGGCGATGGTCTTGACTGAATCC |
| <i>LINC00969</i>          | forward | GCACAGCCAGAGGACAACACATC  |
|                           | reverse | ACGTAGGAGGCATTCTCGACACC  |
| <i>LINC00886</i>          | forward | CTAGGATTACAGGCACGCACCAC  |
|                           | reverse | AGGCTGAGGCAGGTGGATCAC    |
| <i>HCG17</i>              | forward | GCCACACCGTAGTCATAGAGCAAG |
|                           | reverse | GGAGGAACAGCCGTGCATCAAG   |
| <i>RP11-85G18.6</i>       | forward | AGAGGCAGCAGAAGAGGAGGAAG  |
|                           | reverse | TTGGCGATGGTCTTGACTGAATCC |
| <i>PGM5P2</i>             | forward | CGAGATCGTGGTGCAGATGGC    |
|                           | reverse | GGAGACCGCAGGTGTTGACAAG   |
| <i>LINC00869</i>          | forward | TTCGGTCTTGCCTTGAACACATCC |
|                           | reverse | CCTCCTCCTCCTCCTCCTCCTC   |
| <i>FAM27L</i>             | forward | GGCTCCGGCCTGACTTCTCC     |
|                           | reverse | CTTGGCTGGAGTGTGGTCATCTTG |
| <i>ZNF883</i>             | forward | ATCCCTGACCCAGCATCAGA     |
|                           | reverse | TCCGGGTAAGGACTTACCACA    |
| <i>LINC01317</i>          | forward | AGGCGGAGTGTGCTCTGTC      |
|                           | reverse | GAGGCAGGAGAATGGCGTGAAC   |
| <i>CROCCP2</i>            | forward | CTGGCGGACTCCTCTTCTCCTC   |
|                           | reverse | GAGTAACTTGTGGCAGGCGTGAG  |
| <i>RP1-274L7.1</i>        | forward | CGAGGCGTGCGGTCTTCTG      |
|                           | reverse | TCCTCCGTCCGTAGCGTACAG    |
| <i>RP11-114H24.7</i>      | forward | AGAGGCAGCAGAAGAGGAGGAAG  |
|                           | reverse | TTGGCGATGGTCTTGACTGAATCC |
| <i>LINC00477</i>          | forward | TCCACTTCTGCCACTCCTGAGAC  |
|                           | reverse | GCTATGACCATATCGCTGCACTCC |
| <i>RP4-806M20.3</i>       | forward | CGCACGCCTCTCAACTACATCC   |
|                           | reverse | AGGACCACCAAGGACCACAGG    |
| <i>CXADRP3</i>            | forward | TGCTTGCTCTAGTGCTCATTGGTC |
|                           | reverse | GCTTCTGGCAGCGGACGTAC     |
| <i>TSIX</i>               | forward | TGGATGGCTTCAATGTCTGGCTTC |
|                           | reverse | CTGAGGCAGGAGAATGGTGTGAAC |
| <i>XIST</i>               | forward | TCCAGTTCTGTCGAGTGTCAAG   |
|                           | reverse | GCAAGACCTTCAGCCGCCATC    |
| <i>TSPAN</i>              | forward | CCTTGGAGTCGAGTCAGGGT     |
|                           | reverse | CCCGAAGTAGGTAAGAGTCACC   |
| <i>KCNQ10T1</i>           | forward | GAGGCTTTCAAAGTACAGGGG    |
|                           | reverse | CAAGGAGTCAATCTCAGCGTC    |
| <i>YIPF</i>               | forward | GTTCCATCAGAGATGCTCATGTC  |
|                           | reverse | GCAAAGGAGGCTCTTCATCAA    |

## LincRNA-01317 inhibits human gastric cancer growth

|              |         |                          |
|--------------|---------|--------------------------|
| <i>GABPB</i> | forward | TGGGAAAGAGGTTGCTAGAAGC   |
|              | reverse | GTGGAGGGGTGATGTTCCAAG    |
| <i>LPP</i>   | forward | CCCGTAGTTGCTCCAAAAC      |
|              | reverse | CCCTGACTTTGAAAGCCTCTTC   |
| <i>PEX26</i> | forward | GTGCTCCCTGTGTGTTGTG      |
|              | reverse | GGGACCTGGTAATACTGAAGGAC  |
| <i>TTL</i>   | forward | AACGAGCTGTGCTACAAGGTC    |
|              | reverse | GCGTGGTCGATGAGGAAGA      |
| <i>KCNJ6</i> | forward | GACAGAATCCATGACTAACGTCC  |
|              | reverse | CTGGCCTGCTTAGGCAACTTT    |
| <i>SMGL</i>  | forward | GGCCTCGAAACTGATAACATGA   |
|              | reverse | ACTTTTCCGTCGGCTACTTATG   |
| <i>CNKSR</i> | forward | GACTGCCTGCAACAATATGTCC   |
|              | reverse | CTGGTGCCAATCCGTGTGAC     |
| <i>GAPDH</i> | forward | GCCACCCAGAAGACTGTGGATGGC |
|              | reverse | CATGTAGGCCATGAGGTCCACCAC |

---

## LincRNA-01317 inhibits human gastric cancer growth

**Supplementary Table 2.** Most susceptible to mutation in TCGA

| Symbol           | Name                                                 | Cytoband | Type    | # Affected         | # Affected                 | # Mutations |
|------------------|------------------------------------------------------|----------|---------|--------------------|----------------------------|-------------|
|                  |                                                      |          |         | Cases<br>in Cohort | Cases<br>Across the<br>GDC |             |
| XIST             | X inactive specific transcript (non-protein coding)  | Xq13.2   | lincRNA | 43/206 (20.87%)    | 554/10202                  | 54          |
| TSIX             | TSIX transcript, XIST antisense RNA                  | Xq13.2   | lincRNA | 25/206 (12.14%)    | 345/10202                  | 32          |
| RP11-85G18.6     | RP11-85G18.6                                         | 10p12.1  | lincRNA | 21/206 (10.19%)    | 321/10202                  | 30          |
| CXADRP3          | coxsackie virus and adenovirus receptor pseudogene 3 | 18p11.21 | lincRNA | 17/206 (8.25%)     | 191/10202                  | 17          |
| RP4-806M20.3     | RP4-806M20.3                                         | 20q13.32 | lincRNA | 15/206 (7.28%)     | 127/10202                  | 15          |
| CTD-2139B15.2    | CTD-2139B15.2                                        | 5p15.1   | lincRNA | 14/206 (6.80%)     | 117/10202                  | 9           |
| LINC00477        | long intergenic non-protein coding RNA 477           | 12p12.1  | lincRNA | 13/206 (6.31%)     | 128/10202                  | 11          |
| RP11-114H24.7    | RP11-114H24.7                                        | 15q24.3  | lincRNA | 12/206 (5.83%)     | 188/10202                  | 12          |
| RP1-274L7.1      | RP1-274L7.1                                          |          | lincRNA | 11/206 (5.34%)     | 160/10202                  | 12          |
| CROCCP2          | ciliary rootlet coiled-coil, rootletin pseudogene 2  | 1p36.13  | lincRNA | 11/206 (5.34%)     | 260/10202                  | 11          |
| AC015849.16      | AC015849.16                                          | 17q12    | lincRNA | 10/206 (4.85%)     | 139/10202                  | 10          |
| CTD-2066L21.3    | CTD-2066L21.3                                        | 5p13.3   | lincRNA | 10/206 (4.85%)     | 108/10202                  | 10          |
| LINC01317        | long intergenic non-protein coding RNA 1317          | 2p22.3   | lincRNA | 9/206 (4.37%)      | 146/10202                  | 9           |
| CTD-2206N4.2     | CTD-2206N4.2                                         | 17q12    | lincRNA | 9/206 (4.37%)      | 139/10202                  | 11          |
| ZNF883           | zinc finger protein 883                              | 9q32     | lincRNA | 9/206 (4.37%)      | 112/10202                  | 9           |
| FAM27L           | family with sequence similarity 27-like              | 17p11.2  | lincRNA | 9/206 (4.37%)      | 114/10202                  | 8           |
| LINC00869        | long intergenic non-protein coding RNA 869           | 1q21.2   | lincRNA | 9/206 (4.37%)      | 138/10202                  | 9           |
| PGM5P2           | phosphoglucomutase 5 pseudogene 2                    | 9p11.2   | lincRNA | 8/206 (3.88%)      | 149/10202                  | 8           |
| RP11-147L13.11   | RP11-147L13.11                                       | 17q24.2  | lincRNA | 8/206 (3.88%)      | 105/10202                  | 8           |
| HCG17            | HLA complex group 17 (non-protein coding)            | 6p22.1   | lincRNA | 8/206 (3.88%)      | 79/10202                   | 7           |
| RP11-313I2.11    | RP11-313I2.11                                        | 11q14.3  | lincRNA | 7/206 (3.40%)      | 140/10202                  | 6           |
| LLNLR-249E10.1   | LLNLR-249E10.1                                       | 19p13.12 | lincRNA | 7/206 (3.40%)      | 84/10202                   | 7           |
| LINC00886        | long intergenic non-protein coding RNA 886           | 3q25.31  | lincRNA | 7/206 (3.40%)      | 75/10202                   | 7           |
| RP11-32B5.8      | RP11-32B5.8                                          | 15q11.2  | lincRNA | 7/206 (3.40%)      | 102/10202                  | 7           |
| RP11-266K4.9     | RP11-266K4.9                                         | 12p13.31 | lincRNA | 6/206 (2.91%)      | 38/10202                   | 6           |
| LINC00969        | long intergenic non-protein coding RNA 969           | 3q29     | lincRNA | 6/206 (2.91%)      | 127/10202                  | 6           |
| RP11-651P23.5    | RP11-651P23.5                                        | 3q25.1   | lincRNA | 6/206 (2.91%)      | 80/10202                   | 6           |
| RP11-434D2.7     | RP11-434D2.7                                         | 17p11.2  | lincRNA | 6/206 (2.91%)      | 110/10202                  | 6           |
| XXbac-BPG308J9.3 | XXbac-BPG308J9.3                                     | 6p22.1   | lincRNA | 6/206 (2.91%)      | 124/10202                  | 6           |
| LINC01098        | long intergenic non-protein coding RNA 1098          | 4q34.3   | lincRNA | 6/206 (2.91%)      | 87/10202                   | 6           |
| RP11-383M4.6     | RP11-383M4.6                                         | 9q21.32  | lincRNA | 6/206 (2.91%)      | 221/10202                  | 6           |
| AC022007.5       | AC022007.5                                           | 3p25.3   | lincRNA | 6/206 (2.91%)      | 49/10202                   | 5           |
| RP11-306O13.1    | RP11-306O13.1                                        | 6q25.2   | lincRNA | 6/206 (2.91%)      | 71/10202                   | 6           |
| RP11-219A15.2    | RP11-219A15.2                                        | 17p11.2  | lincRNA | 5/206 (2.43%)      | 106/10202                  | 5           |
| RP11-699L21.1    | RP11-699L21.1                                        | 3q29     | lincRNA | 5/206 (2.43%)      | 44/10202                   | 5           |
| AC016995.3       | AC016995.3                                           | 2p22.1   | lincRNA | 5/206 (2.43%)      | 45/10202                   | 5           |
| AC005522.7       | AC005522.7                                           | 7q11.23  | lincRNA | 5/206 (2.43%)      | 40/10202                   | 6           |
| MIR99AHG         | mir-99a-let-7c cluster host gene                     | 21q21.1  | lincRNA | 5/206 (2.43%)      | 51/10202                   | 5           |
| LINC00336        | long intergenic non-protein coding RNA 336           | 6p21.31  | lincRNA | 5/206 (2.43%)      | 54/10202                   | 5           |
| RP11-813I20.2    | RP11-813I20.2                                        | 14q22.3  | lincRNA | 5/206 (2.43%)      | 57/10202                   | 5           |
| RP11-147L13.13   | RP11-147L13.13                                       | 17q24.2  | lincRNA | 5/206 (2.43%)      | 68/10202                   | 6           |
| SPACA6P-AS       | SPACA6P antisense RNA                                | 19q13.41 | lincRNA | 5/206 (2.43%)      | 53/10202                   | 5           |
| AC005863.1       | AC005863.1                                           | 17p12    | lincRNA | 5/206 (2.43%)      | 42/10202                   | 5           |
| FLJ33360         | FLJ33360 protein                                     | 5p15.31  | lincRNA | 5/206 (2.43%)      | 80/10202                   | 5           |
| AC004702.2       | AC004702.2                                           | 17p11.2  | lincRNA | 5/206 (2.43%)      | 55/10202                   | 5           |
| KANTR            | KDM5C adjacent non-coding transcript                 | Xp11.22  | lincRNA | 4/206 (1.94%)      | 47/10202                   | 5           |

# LincRNA-01317 inhibits human gastric cancer growth

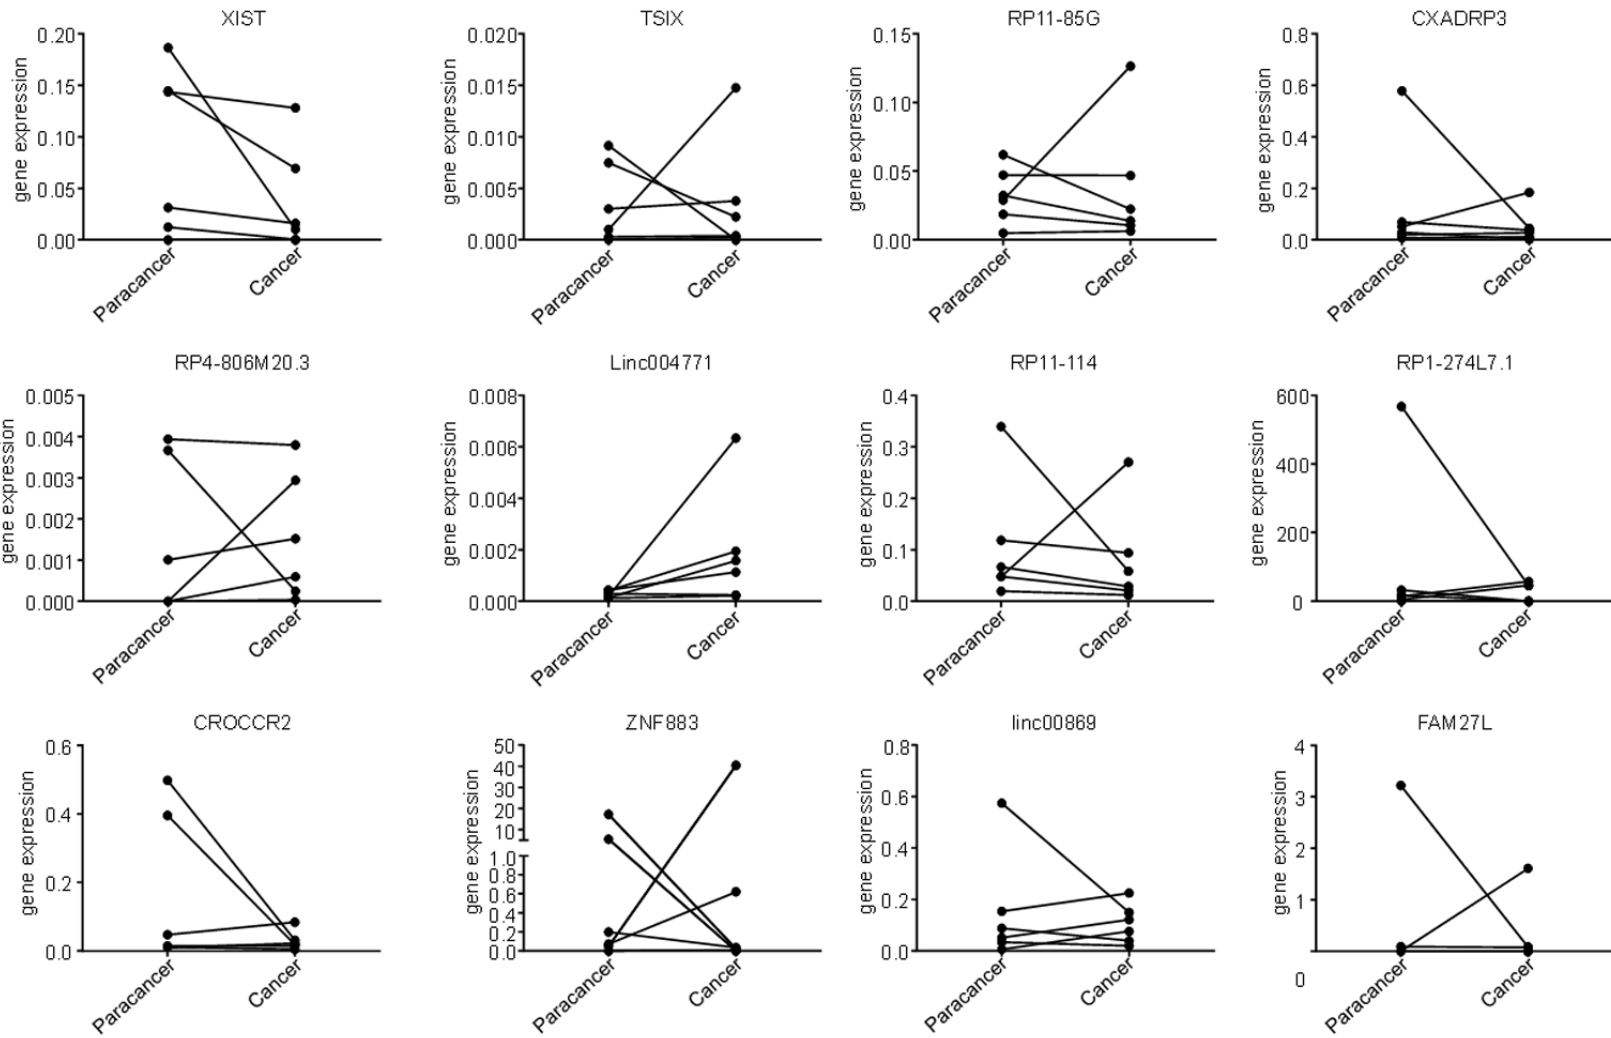

## LincRNA-01317 inhibits human gastric cancer growth

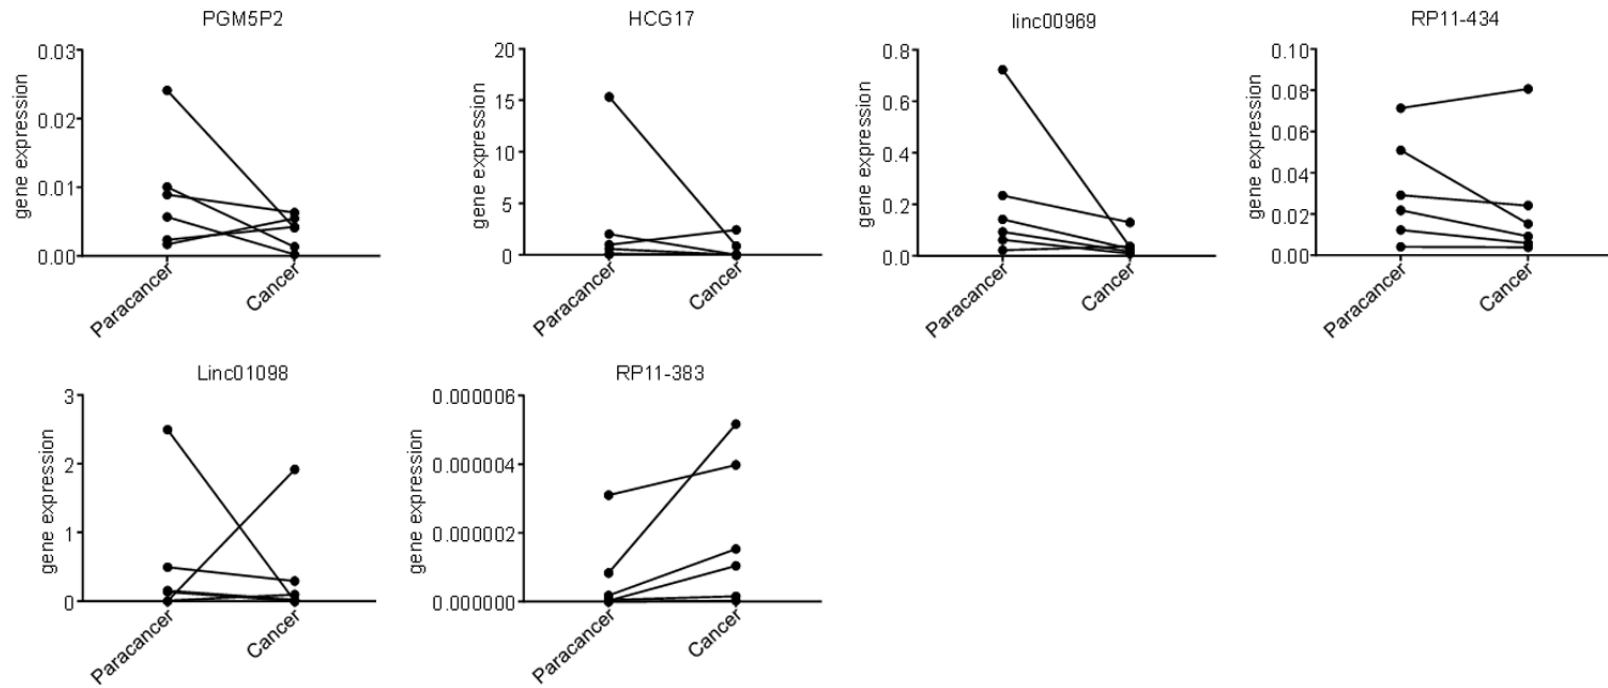

**Supplementary Figure 1.** RT-qPCR results of lincRNA expression. The induction of lincRNA expression in paired samples was measured using RT-qPCR. Samples were collected and lysed, and RNA was extracted for the RT-qPCR assay. Data were pooled from six paired independent samples and expressed as mean  $\pm$  SEM with  $P < 0.05$ .

## LincRNA-01317 inhibits human gastric cancer growth

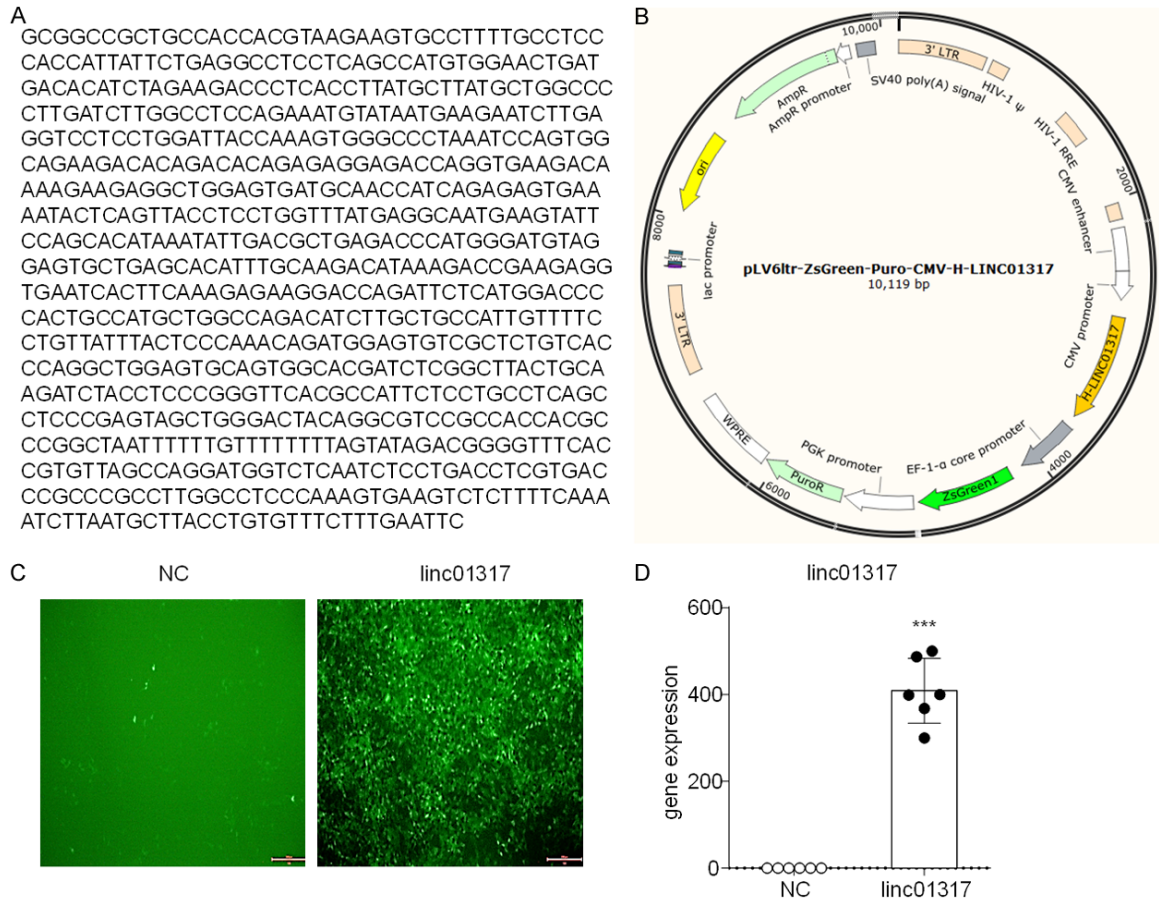

**Supplementary Figure 2.** Tumor cell line transfected with plasmid encoding lincRNA-01317. A. Nucleotide sequences of lincRNA-01317 from human samples. B. LincRNA-01317 plasmid was constructed. C. Tumor cell line successfully transfected with plasmid encoding lincRNA-01317. D. Levels of lincRNA-01317 in NC (control) and lincRNA-01317 cell lines.

## LincRNA-O1317 inhibits human gastric cancer growth

**Supplementary Table 3.** List of RNAs interacting with ENST00000366209 (AC009499.1)

| Rank | Ensemble ID     | Name       | Position (hg19)           | MINENERGY |                      |                       |          | SumEnergy |
|------|-----------------|------------|---------------------------|-----------|----------------------|-----------------------|----------|-----------|
|      |                 |            |                           | MinEnergy | Binding site (query) | Binding site (target) | location |           |
| 1    | ENST00000597346 | KCNQ10T1   | chr11:2629559-2721224     | -89.3     | 671-735              | 74164-74228           | ncRNA    | -13370.2  |
| 2    | ENST00000589042 | TTN        | chr2:179390717-179672150  | -26.3     | 10-61                | 21359-21410           | CDS      | -13110.4  |
| 3    | ENST00000604411 | TSIX       | chrX:73012041-73049066    | -76.9     | 549-604              | 5383-5438             | ncRNA    | -7658.9   |
| 4    | ENST00000397910 | MUC16      | chr19:8959521-9092018     | -41.7     | 194-260              | 27629-27695           | CDS      | -6419.4   |
| 5    | ENST00000607772 | CNKSR3     | chr6:154708639-154831793  | -96.9     | 569-625              | 11615-11671           | UTR3     | -4616.4   |
| 6    | ENST00000609686 | GRIN2B     | chr12:13693166-14133053   | -34.6     | 560-610              | 22345-22395           | UTR3     | -4529.7   |
| 7    | ENST00000373191 | AGO3       | chr1:36396680-36538101    | -80.8     | 544-604              | 12681-12741           | UTR3     | -4439.1   |
| 8    | ENST00000501122 | NEAT1      | chr11:65190270-65213011   | -71.7     | 671-745              | 17793-17867           | ncRNA    | -4280.0   |
| 9    | ENST00000546474 | BRF1       | chr14:105675624-105781926 | -81.2     | 557-614              | 8843-8900             | UTR5     | -3625.3   |
| 10   | ENST00000329627 | PEX26      | chr22:18560690-18588162   | -90.2     | 546-606              | 6496-6556             | UTR3     | -3562.8   |
| 11   | ENST00000295851 | ABI2       | chr2:204192943-204312446  | -82.7     | 541-607              | 18801-18867           | UTR3     | -3502.7   |
| 12   | ENST00000397345 | NEB        | chr2:152341854-152591001  | -23.1     | 1-46                 | 9408-9459             | CDS      | -3496.6   |
| 13   | ENST00000367255 | SYNE1      | chr6:152442820-152958534  | -23.7     | 723-778              | 1184-1239             | CDS      | -3427.8   |
| 14   | ENST00000264065 | DNAJC10    | chr2:183581000-183659191  | -65.1     | 540-605              | 16339-16404           | UTR3     | -3401.0   |
| 15   | ENST00000370754 | DST        | chr6:56322788-56819385    | -28.4     | 437-486              | 21972-22021           | CDS      | -3302.6   |
| 16   | ENST00000312675 | LPP        | chr3:187930722-188608460  | -95.3     | 671-737              | 8490-8556             | UTR3     | -3287.1   |
| 17   | ENST00000361354 | NCKAP1     | chr2:183773844-183903200  | -82.0     | 516-623              | 6039-6146             | UTR3     | -3237.5   |
| 18   | ENST00000564288 | MACF1      | chr1:39669919-39952849    | -21.3     | 724-775              | 15819-15870           | CDS      | -3232.9   |
| 19   | ENST00000368918 | GABPB2     | chr1:151043081-151098018  | -122.4    | 532-625              | 7139-7232             | UTR3     | -3219.2   |
| 20   | ENST00000609713 | KCNJ6      | chr21:38979679-39288749   | -96.2     | 542-606              | 11628-11692           | UTR3     | -3179.3   |
| 21   | ENST00000309955 | CFLAR      | chr2:201980828-202041410  | -79.7     | 539-608              | 6109-6178             | UTR3     | -3125.7   |
| 22   | ENST00000238831 | YIPF4      | chr2:32502980-32541663    | -93.8     | 546-607              | 8229-8290             | UTR3     | -3091.0   |
| 23   | ENST00000335251 | INTU       | chr4:128554088-128647892  | -84.7     | 514-607              | 11686-11779           | UTR3     | -3024.2   |
| 24   | ENST00000367701 | ZBTB37     | chr1:173838095-173872687  | -67.6     | 574-625              | 13905-13956           | UTR3     | -2994.7   |
| 25   | ENST00000406785 | SLC8A1     | chr2:40324411-40679209    | -26.3     | 203-250              | 2800-2847             | CDS      | -2987.8   |
| 26   | ENST00000343098 | FSIP2      | chr2:186603356-186698016  | -27.0     | 559-618              | 187-246               | CDS      | -2955.8   |
| 27   | ENST00000357395 | SYNE2      | chr14:64319684-64693165   | -27.9     | 673-723              | 18007-18057           | CDS      | -2937.9   |
| 28   | ENST00000429989 | TSPAN14    | chr10:82213923-82292879   | -107.1    | 514-625              | 10454-10565           | UTR3     | -2902.3   |
| 29   | ENST00000327381 | XKR4       | chr8:56014950-56454613    | -90.5     | 671-735              | 10377-10441           | UTR3     | -2893.7   |
| 30   | ENST00000355837 | AC005154.6 | chr7:30587974-30604233    | -79.8     | 536-599              | 2923-2986             | ncRNA    | -2875.2   |
| 31   | ENST00000418539 | BCYRN1     | chr2:47558200-47571656    | -81.1     | 541-606              | 2841-2906             | ncRNA    | -2832.2   |
| 32   | ENST00000371655 | RAB3B      | chr1:52373629-52456436    | -96.6     | 546-608              | 1681-1743             | UTR3     | -2786.7   |
| 33   | ENST00000333891 | PCLO       | chr7:82383330-82792246    | -23.2     | 212-271              | 8276-8335             | CDS      | -2785.7   |
| 34   | ENST00000526775 | CACNA1E    | chr1:181452717-181777219  | -38.5     | 205-257              | 8997-9049             | UTR3     | -2761.3   |

LincRNA-01317 inhibits human gastric cancer growth

|    |                 |              |                          |        |         |             |       |         |
|----|-----------------|--------------|--------------------------|--------|---------|-------------|-------|---------|
| 35 | ENST00000261491 | DGKH         | chr13:42622890-42817032  | -86.8  | 542-606 | 15361-15425 | UTR3  | -2754.6 |
| 36 | ENST00000446231 | SMG1         | chr16:18816176-18937776  | -139.4 | 533-625 | 13056-13148 | UTR3  | -2728.2 |
| 37 | ENST00000381318 | ITSN1        | chr21:35014765-35272165  | -79.7  | 543-608 | 10626-10691 | UTR3  | -2650.0 |
| 38 | ENST00000367941 | STX7         | chr6:132767007-132834201 | -62.5  | 671-728 | 10309-10366 | UTR3  | -2646.5 |
| 39 | ENST00000473989 | UBN2         | chr7:138916232-138992982 | -90.1  | 671-735 | 8649-8713   | UTR3  | -2645.7 |
| 40 | ENST00000429829 | XIST         | chrX:73040492-73072588   | -33.4  | 194-256 | 12309-12371 | ncRNA | -2630.3 |
| 41 | ENST00000366847 | FGFR10P      | chr6:167412671-167466201 | -90.1  | 546-603 | 7075-7132   | UTR3  | -2600.7 |
| 42 | ENST00000437048 | VPS53        | chr17:411909-618096      | -70.3  | 671-735 | 5150-5214   | UTR3  | -2574.8 |
| 43 | ENST00000361565 | IPO9         | chr1:201798270-201853422 | -79.5  | 542-602 | 4953-5013   | UTR3  | -2555.8 |
| 44 | ENST00000324306 | ZKSCAN1      | chr7:99613205-99639312   | -82.8  | 547-606 | 5633-5692   | UTR3  | -2555.5 |
| 45 | ENST00000233336 | TTL          | chr2:113239732-113299316 | -101.2 | 542-607 | 6733-6798   | UTR3  | -2553.9 |
| 46 | ENST00000430027 | DLX6-AS1     | chr7:96584454-96643377   | -51.6  | 536-610 | 3577-3651   | ncRNA | -2551.9 |
| 47 | ENST00000443374 | RP11-50E11.3 | chr10:52384712-52401211  | -89.1  | 536-604 | 12058-12126 | ncRNA | -2525.5 |
| 48 | ENST00000608999 | PPP1R12B     | chr1:202317828-202561834 | -79.0  | 544-591 | 5326-5373   | UTR3  | -2512.5 |
| 49 | ENST00000356387 | ORAI2        | chr7:102073997-102097268 | -93.7  | 543-602 | 5037-5096   | UTR3  | -2480.3 |
| 50 | ENST00000610020 | RPAP2        | chr1:92764523-92867613   | -47.2  | 573-625 | 12192-12244 | UTR3  | -2467.3 |



## LincRNA-01317 inhibits human gastric cancer growth

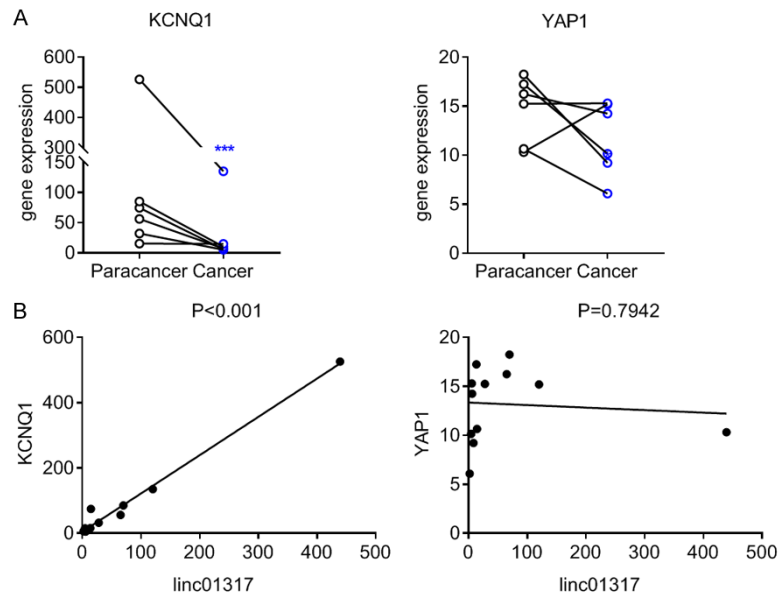

**Supplementary Figure 3.** KCNQ1 and YAP1 expression. A. Levels of KCNQ1 and YAP1 in 6 pairs of gastric cancer tissue and corresponding paracancer tissue were detected using RT-qPCR. The RT-qPCR results are shown as the mean  $\pm$  SEM. B. Relative expression of KCNQ1, YAP1, and lincRNA-01317 in gastric cancer tissue and corresponding paracancer tissue.
